# Supplementary material for: The role of simple mathematical models in malaria elimination strategy design
Source: PubMed Central journal article supplement (PMC2754494; doi:10.1186/1475-2875-8-212), 2009-09-14
Supplement: 1475-2875-8-212-S1.pdf [file 1475-2875-8-212-S1.pdf]

## **The Baseline and Elimination Model Equations, Derivations and Parameter Values**

Lisa J. White<sup>1,2\*</sup>, Richard J Maude<sup>1,2</sup>, Wirichada Pongtavornpinyo<sup>2</sup>, Sompob Saralamba<sup>2</sup>, Ricardo Aguas<sup>3</sup>, Thierry Van Effeltherre<sup>4</sup>, Nicholas PJ Day<sup>1,2</sup>, Nicholas J White<sup>1,2</sup>

1. Centre for Clinical Vaccinology and Tropical Medicine, Nuffield Department of Clinical Medicine, John Radcliffe Hospital, University of Oxford, Oxford, UK
2. Faculty of Tropical Medicine, Mahidol University, Bangkok, Thailand
3. Instituto Gulbenkian de Ciência, Oeiras, Portugal
4. GlaxoSmithKline Biologicals, Rixensart, Belgium

\* Corresponding author

## Baseline model

The diagram shows the compartmental structure of the model with time dependent variables:  $S$  (uninfected and non-immune);  $I_1$  (infected with no prior immunity);  $R$  (uninfected with immunity);  $I_2$  (infected with prior immunity). Model output variables are:  $C$  (clinical infections);  $P$  (proportion of people receiving treatment or selective pressure);  $C_c$  (cumulative clinical infections);  $P_c$  (cumulative selective pressure).

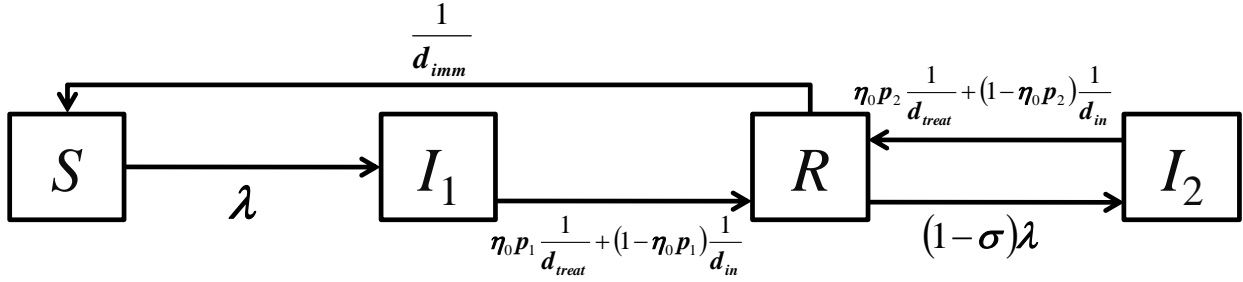

The equations below describe this system:

$$\begin{aligned}
 S' &= \frac{N}{L} - \left( \lambda + \frac{1}{L} \right) S + \frac{1}{d_{imm}} R \\
 I_1' &= \lambda S - \left( \eta_0 p_1 \frac{1}{d_{treat}} + (1 - \eta_0 p_1) \frac{1}{d_{in}} + \frac{1}{L} \right) I_1 \\
 I_2' &= \lambda R - \left( \eta_0 p_2 \frac{1}{d_{treat}} + (1 - \eta_0 p_2) \frac{1}{d_{in}} + \frac{1}{L} \right) I_2 \\
 R' &= \left( \eta_0 p_1 \frac{1}{d_{treat}} + (1 - \eta_0 p_1) \frac{1}{d_{in}} \right) I_1 + \left( \eta_0 p_2 \frac{1}{d_{treat}} + (1 - \eta_0 p_2) \frac{1}{d_{in}} \right) I_2 - \left[ \lambda + \frac{1}{d_{imm}} + \frac{1}{L} \right] R \\
 \lambda &= R_0 \left( \frac{1}{L} + \frac{1}{d_{treat}} \right) \frac{(I_1 + I_2)}{N} & p_{res} &= \frac{\frac{1}{d_{treat}} - \frac{1}{d_{treat0}}}{\frac{1}{d_{in}} - \frac{1}{d_{treat0}}} \\
 C &= p_1 I_1 + p_2 I_2 & \tau' &= -k P p_{res} \left( \tau - \frac{1}{d_{in}} \right) \\
 P &= \frac{\eta_0 (p_1 I_1 + p_2 I_2)}{I_1 + I_2} & d_{treat} &= \frac{1}{\tau} \\
 C_c' &= C \\
 P_c' &= P
 \end{aligned}$$

The initial conditions of the variables  $S$ ,  $I_1$ ,  $I_2$  and  $R$  are given by the equilibrium solution of the system with  $d_{treat} = d_{treat0}$ . The initial conditions of  $C_c$  and  $P_c$  are zero and the initial condition of  $\tau$  is  $(1/d_{treat0})$ .

#### Parameter values

| Symbol       | Definition                                                                                                                    | Value                 | Source                                                                      |
|--------------|-------------------------------------------------------------------------------------------------------------------------------|-----------------------|-----------------------------------------------------------------------------|
| $N$          | Population size                                                                                                               | $10^6$                |                                                                             |
| $L$          | Average life expectancy                                                                                                       | 50 years              |                                                                             |
| $d_{imm}$    | Average duration of immunity in the absence of re-exposure                                                                    | 1 year                | [1]                                                                         |
| $d_{in}$     | Average duration of untreated infection                                                                                       | 0.5 year              | Assumed                                                                     |
| $d_{treat0}$ | Average duration of treated sensitive infection                                                                               | 2 wks (figure 5)      | [2]                                                                         |
|              |                                                                                                                               | 4 wks (other figures) | Assumed                                                                     |
| $p_1$        | Average proportion of infected individuals without preexisting immunity that have clinical malaria                            | 0.87                  | [1] &<br>$p_1 = \frac{d_{treat}(d_{in} - 14.12)}{d_{treat}d_{in} - \eta_0}$ |
| $p_2$        | Average proportion of infected individuals that have clinical malaria who have experienced infection previously within a year | 0.08                  | [1] &<br>$p_1 = \frac{d_{treat}(d_{in} - 2.23)}{d_{treat}d_{in} - \eta_0}$  |
| $k$          | coefficient of speed of spread of resistance                                                                                  | 0 - 0.1               | Assumed                                                                     |
| $\eta_0$     | percentage of individuals with clinical infection that receive treatment                                                      | 60                    | Assumed                                                                     |
| $R_0$        | Basic reproduction number                                                                                                     | 2.4 – 63              | corresponds to parasite prevalence of 20% to 98%                            |

Given presumptive treatment of clinical cases at a coverage of 60%,  $k=0.04$  indicates that the percentage of resistant infections would increase from 0% to about 50% in 20 to 40 years depending on transmission intensity.  $k=0.08$  indicates that the percentage of resistant infections would increase from 0% to about 50% in 5 to 20 years depending on transmission intensity

## Elimination model

This model is produced from two linked copies of the basic model with the presence or absence of the subscript  $V$  representing individuals who have received or not received effective vaccine respectively. The additional variables  $h$ ,  $m$  and  $x$  represent respectively rates of receiving routine treatment, receiving treatment as part of MSAT and vaccination.

$$\begin{aligned}
S' &= (1 - c_b) \frac{N}{L} - \left( \pi \lambda + \frac{1}{L} \right) S + \frac{1}{d_{imm}} R - x(t) S + y S_V \\
I_1' &= \pi \lambda S - \left( \frac{(\eta p_1 + m)}{d_{treat}} + \frac{(1 - \eta p_1 - m)}{d_{in}} + \frac{1}{L} + \frac{m}{d_{treat}} \right) I_1 - x(t) I_1 + y I_{1V} - m(t) I_1 \\
I_2' &= \pi \lambda R - \left( \frac{(\eta p_2 + m)}{d_{treat}} + \frac{(1 - \eta p_2 - m)}{d_{in}} + \frac{1}{L} + \frac{m}{d_{treat}} \right) I_2 - x(t) I_2 + y I_{2V} - m(t) I_2 \\
R' &= \left( \frac{(\eta p_1 + m)}{d_{treat}} + \frac{(1 - \eta p_1 - m)}{d_{in}} + \frac{m}{d_{treat}} \right) I_1 + \left( \frac{(\eta p_2 + m)}{d_{treat}} + \frac{(1 - \eta p_2 - m)}{d_{in}} + \frac{m}{d_{treat}} \right) I_2 \\
&\quad - \left[ \pi \lambda + \frac{1}{d_{imm}} + \frac{1}{L} \right] R - x(t) R + y R_V \\
S_V' &= c_b \frac{N}{L} - \left( \rho \pi \lambda + \frac{1}{L} \right) S_V + \frac{1}{d_{imm}} R_V + x(t) S - y S_V \\
I_{1V}' &= \rho \pi \lambda S_V - \left( \frac{(\eta p_1 + m)}{d_{treat}} + \frac{(1 - \eta p_1 - m)}{d_{in}} + \frac{1}{L} + \frac{m}{d_{treat}} \right) I_{1V} + x(t) I_1 - y I_{1V} \\
I_{2V}' &= \rho \pi \lambda R_V - \left( \frac{(\eta p_2 + m)}{d_{treat}} + \frac{(1 - \eta p_2 - m)}{d_{in}} + \frac{1}{L} + \frac{m}{d_{treat}} \right) I_{2V} + x(t) I_2 - y I_{2V} \\
R_V' &= \left( \frac{(\eta p_1 + m)}{d_{treat}} + \frac{(1 - \eta p_1 - m)}{d_{in}} + \frac{1}{L} + \frac{m}{d_{treat}} \right) I_{1V} + \left( \frac{(\eta p_2 + m)}{d_{treat}} + \frac{(1 - \eta p_2 - m)}{d_{in}} + \frac{1}{L} + \frac{m}{d_{treat}} \right) I_{2V} \\
&\quad - \left[ \rho \pi \lambda + \frac{1}{d_{imm}} + \frac{1}{L} \right] R_V + x(t) R - y R_V \\
\lambda &= \frac{R_0 \left( \frac{1}{L} + \frac{1}{d_{treat}} \right) (I_1 + I_2 + I_{1V} + I_{2V})}{N} \\
C &= p_1 (I_1 + I_{1V}) + p_2 (I_2 + I_{2V}) \\
P &= \frac{\eta p_1 (I_1 + I_{1V}) + \eta p_2 (I_2 + I_{2V}) + m (I_1 + I_{1V} + I_2 + I_{2V})}{(I_1 + I_{1V} + I_2 + I_{2V})} \\
C_c' &= C \\
P_c' &= P \\
p_{res} &= \frac{\frac{1}{d_{treat}} - \frac{1}{d_{treat0}}}{\frac{1}{d_{in}} - \frac{1}{d_{treat0}}} \\
\tau' &= -k P p_{res} \left( \tau - \frac{1}{d_{in}} \right) \\
d_{treat} &= \frac{1}{\tau} \\
\eta(t) &= \begin{cases} 0 & \text{for } \text{mod}(t, 1) \geq \frac{9}{12} \\ \eta_0 & \text{for } \text{mod}(t, 1) < \frac{9}{12} \end{cases} \\
x(t) &= \begin{cases} -4 \ln \left( \frac{100 - c}{100} \right) & \text{for } \text{mod}(t, 1) \geq \frac{9}{12} \\ 0 & \text{for } \text{mod}(t, 1) < \frac{9}{12} \end{cases} \\
m(t) &= \begin{cases} 1 - \exp \left( 4 \ln(1 - m_{sat}) \text{mod} \left( t - \frac{9}{12} \right) \right) & \text{for } \text{mod}(t, 1) \geq \frac{9}{12} \\ 0 & \text{for } \text{mod}(t, 1) < \frac{9}{12} \end{cases}
\end{aligned}$$

The initial conditions are as for the baseline model for the non-vaccine variables. The initial conditions for the vaccine variables are all zero. To derive the formula for the rate of vaccination  $x(t)$ , we consider a population being vaccinated at a constant rate  $q$  given an initial condition of 100%. Then the differential equation describing the percentage of vaccinated individuals,  $n$ , is given by  $n' = q(100 - n)$  with solution  $n(t) = 100 - 100e^{-qt}$ . Thus to achieve a coverage,  $c$ , in 3 months (i.e.  $\frac{1}{4}$  years)  $n\left(\frac{1}{4}\right) = 100 - 100e^{-\frac{q}{4}} = c$ , thus  $q = -4 \ln\left(\frac{100 - c}{100}\right)$ , which should be the function for  $x(t)$  during the period of vaccination each year.

#### Parameter values

| Symbol    | Definition                                                      | Value                    | Source |
|-----------|-----------------------------------------------------------------|--------------------------|--------|
| $\rho$    | proportional vaccine efficacy                                   | 0 to 1                   | [3]    |
| $\pi$     | reduction in force of infection due to increased vector control | 0.3                      | [4]    |
| $c$       | annual vaccine coverage                                         | 80 %                     |        |
| $y$       | rate of loss of vaccine effect                                  | 1- 10 year <sup>-1</sup> | [3]    |
| $m_{sat}$ | proportion of infected people treated during MSAT               | 0.8                      | [2]    |

#### References

1. R Aguas, LJ White, RW Snow, MG Gomes: **Prospects for malaria eradication in sub-Saharan Africa.** *PLoS ONE* 2008, **3**:e1767.
2. RJ Maude, W Pontavornpinyo, S Saralamba, R Aguas, S Yeung, AM Dondorp, NP Day, NJ White, LJ White: **The last man standing is the most resistant: eliminating artemisinin-resistant malaria in Cambodia.** *Malaria Journal* 2009, **8**:31.
3. N Maire, JJ Aponte, A Ross, R Thompson, P Alonso, J Utzinger, M Tanner, T Smith: **Modeling a field trial of the RTS,S/AS02A malaria vaccine.** *American Journal of Tropical Medicine and Hygiene* 2006, **75**:104-10.
4. T Sochantha, S Hewitt, C Nguon, L Okell, N Alexander, S Yeung, H Vannara, M Rowland, D Socheat: **Insecticide-treated bednets for the prevention of Plasmodium falciparum malaria in Cambodia: a cluster-randomized trial.** *Tropical Medicine and International Health* 2006, **11**:1166-77.
